# Supplementary material
Source: MDPI journal article supplement (https://www.mdpi.com/2311-5637/9/1/72)
Supplement: s1 [file s1]

**Supplementary information 1** – Almeida et al. Physiological and molecular characterization of yeast cultures pre-adapted for fermentation of lignocellulosic hydrolysate

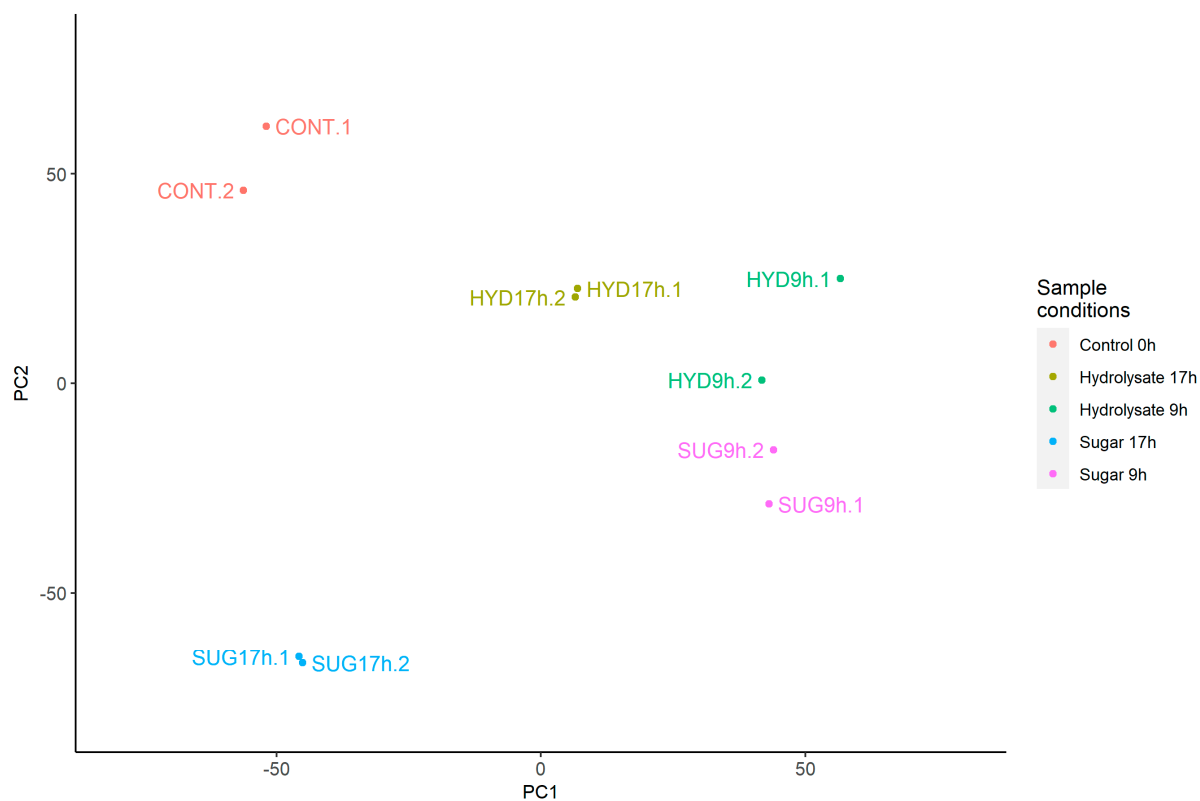

**Figure S1.** Principal component analysis of the *S. cerevisiae* probes from the 10 microarray samples, after RMA normalization. The biological replicates (.1 and .2) clustered together per sample, which suggest good reproducibility in the experimental workflow. Other trends include how the four hydrolysate samples, and the samples from time point 9h generally clustered together, respectively.

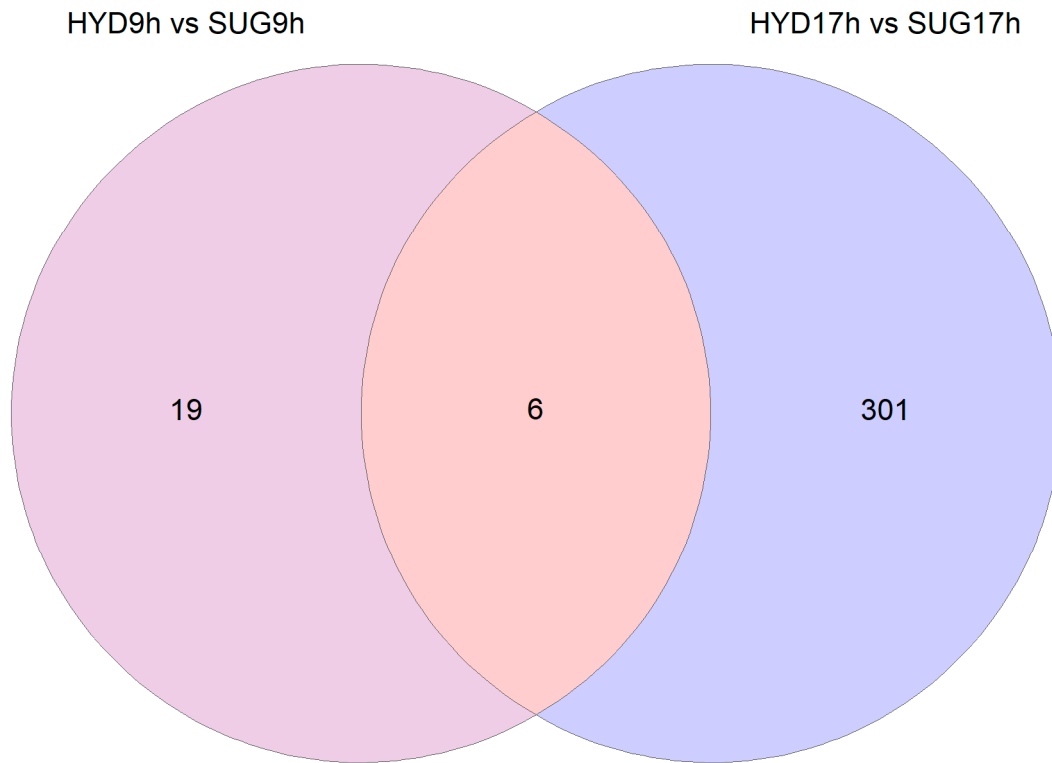

**Figure S2.** Venn diagram showing the intersection of the significantly differentially expressed genes identified in the 9h and 17h comparisons. Six genes were found to differentially expressed in both comparisons: *YHK8*, *OYE3*, *HBN1* were up-regulated in both conditions; *CTR1* and *RCK1* were down-regulated in both conditions. For more details on the gene names, see Table S1 below, and Supplemental Information 2 for the full processed microarray dataset.

**Table S1.** List of the genes that were found to be significantly up- or down-regulated in hydrolysate as compared to the sugar medium. Genes that were found at both times are highlighted in bold.

| Sample     | Up-regulated genes                                                                                                                                                                                                                                                                                                                                                                                                                                                                                                                                                                                                                                                                                                                                                                          |                                                                                                                                                                                                                                                                                                                                                                                                                                                                                                                                                                                                                                                                                                                                                        |                                                                                                                                                                                                                                                                                                                                                                                                                                                                                                                                                                                                                                                                                                                                           | Down-regulated genes                                                                                                                                                                                                                                                                                                                                                                                                                                                                                           |                                                                                                                                                                                                                                                                                                                                                                                                                                                                                          |                                                                                                                                                                                                                                                                                                                                                                                                                                                        |
|------------|---------------------------------------------------------------------------------------------------------------------------------------------------------------------------------------------------------------------------------------------------------------------------------------------------------------------------------------------------------------------------------------------------------------------------------------------------------------------------------------------------------------------------------------------------------------------------------------------------------------------------------------------------------------------------------------------------------------------------------------------------------------------------------------------|--------------------------------------------------------------------------------------------------------------------------------------------------------------------------------------------------------------------------------------------------------------------------------------------------------------------------------------------------------------------------------------------------------------------------------------------------------------------------------------------------------------------------------------------------------------------------------------------------------------------------------------------------------------------------------------------------------------------------------------------------------|-------------------------------------------------------------------------------------------------------------------------------------------------------------------------------------------------------------------------------------------------------------------------------------------------------------------------------------------------------------------------------------------------------------------------------------------------------------------------------------------------------------------------------------------------------------------------------------------------------------------------------------------------------------------------------------------------------------------------------------------|----------------------------------------------------------------------------------------------------------------------------------------------------------------------------------------------------------------------------------------------------------------------------------------------------------------------------------------------------------------------------------------------------------------------------------------------------------------------------------------------------------------|------------------------------------------------------------------------------------------------------------------------------------------------------------------------------------------------------------------------------------------------------------------------------------------------------------------------------------------------------------------------------------------------------------------------------------------------------------------------------------------|--------------------------------------------------------------------------------------------------------------------------------------------------------------------------------------------------------------------------------------------------------------------------------------------------------------------------------------------------------------------------------------------------------------------------------------------------------|
| <b>9h</b>  | <i>GAL10</i><br><i>GAL7</i><br><i>GAL2</i><br><i>GAL1</i><br><i>AAD4</i><br><i>YLR108C</i>                                                                                                                                                                                                                                                                                                                                                                                                                                                                                                                                                                                                                                                                                                  | <i>FLR1</i><br><i>CUP1-1</i><br><i>PTR2</i><br><i>YOR389W</i><br><i>SNG1</i><br><i>ARN1</i>                                                                                                                                                                                                                                                                                                                                                                                                                                                                                                                                                                                                                                                            | <i>YPL278c</i><br><i>ATR</i><br><b><i>YHK8</i></b><br><b><i>OYE3</i></b><br><b><i>HBN1</i></b><br><b><i>YPR159C-A</i></b>                                                                                                                                                                                                                                                                                                                                                                                                                                                                                                                                                                                                                 | <b><i>CTR1</i></b><br><b><i>RCK1</i></b><br><i>AQY1</i>                                                                                                                                                                                                                                                                                                                                                                                                                                                        | <i>FET4</i><br><i>HXT2</i>                                                                                                                                                                                                                                                                                                                                                                                                                                                               | <i>ZRT1</i><br><i>SUL1</i>                                                                                                                                                                                                                                                                                                                                                                                                                             |
| <b>17h</b> | <b><i>YHK8</i></b><br><i>YBR219C</i><br><b><i>YPR159C-A</i></b><br><i>MCH2</i><br><i>YBL008W-A</i><br><i>AIM33</i><br><b><i>OYE3</i></b><br><i>OYE2</i><br><i>FSH1</i><br><i>UPS2</i><br><i>YBR298C-A</i><br><b><i>HBN1</i></b><br><i>AMF1</i><br><i>YGR035C</i><br><i>MAL12</i><br><i>FET3</i><br><i>CUZ1</i><br><i>MIG2</i><br><i>IMA1</i><br><i>HAP4</i><br><i>HAP3</i><br><i>YNL217W</i><br><i>PDR16</i><br><i>YPL034W</i><br><i>YGL230C</i><br><i>POF1</i><br><i>MRI1</i><br><i>SDD2</i><br><i>NUC1</i><br><i>VPH2</i><br><i>TDA2</i><br><i>ASN1</i><br><i>POP5</i><br><i>ADH6</i><br><i>YOL029C</i><br><i>LSM5</i><br><i>HR11</i><br><i>YLR012C</i><br><i>ATX2</i><br><i>HMLALPHA1</i><br><i>TTI2</i><br><i>PRM10</i><br><i>TIM9</i><br><i>MIX14</i><br><i>YPL088W</i><br><i>NEL1</i> | <i>STL1</i><br><i>KRR1</i><br><i>KAR1</i><br><i>KTR5</i><br><i>CWC21</i><br><i>APC11</i><br><i>ERG4</i><br><i>YBR096W</i><br><i>YJR011C</i><br><i>NRG2</i><br><i>YCR087C-A</i><br><i>FBP1</i><br><i>NRK1</i><br><i>YGK3</i><br><i>CYC1</i><br><i>HIS6</i><br><i>TRR1</i><br><i>ADO1</i><br><i>EPT1</i><br><i>DPB3</i><br><i>ETT1</i><br><i>YDR210W</i><br><i>TRS33</i><br><i>YKL033W-A</i><br><i>ATP20</i><br><i>CDA2</i><br><i>MHF2</i><br><i>DIB1</i><br><i>PRO1</i><br><i>CIR1</i><br><i>CAF16</i><br><i>YCR043C</i><br><i>SMI1</i><br><i>YDL085C-A</i><br><i>CBS1</i><br><i>AAT1</i><br><i>TAD2</i><br><i>RCE1</i><br><i>MED4</i><br><i>URM1</i><br><i>MET31</i><br><i>YDR222W</i><br><i>TRM13</i><br><i>SKG6</i><br><i>PAN5</i><br><i>YLR050C</i> | <i>RPC25</i><br><i>ATF2</i><br><i>POP8</i><br><i>ERG3</i><br><i>GCG1</i><br><i>YJL107C</i><br><i>SMC2</i><br><i>CPT1</i><br><i>MKC7</i><br><i>YPL199C</i><br><i>DTD1</i><br><i>YER158C</i><br><i>ERG26</i><br><i>HIS2</i><br><i>DUT1</i><br><i>ADE17</i><br><i>MIS1</i><br><i>EMC6</i><br><i>MPC2</i><br><i>YDL157C</i><br><i>SAM4</i><br><i>LDB18</i><br><i>TPM1</i><br><i>YIL027C</i><br><i>RPS18B</i><br><i>APT1</i><br><i>ERG27</i><br><i>GUA1</i><br><i>JLP2</i><br><i>NDE1</i><br><i>DAL3</i><br><i>MCM5</i><br><i>ALD6</i><br><i>HPT1</i><br><i>ACS2</i><br><i>YEF3</i><br><i>YSY6</i><br><i>HXK2</i><br><i>LEU9</i><br><i>LCL2</i><br><i>CLA4</i><br><i>JEM1</i><br><i>TKL1</i><br><i>INO1</i><br><i>YBL081W</i><br><i>RPS17B</i> | <i>YNR071C</i><br><i>MAN2</i><br><i>PDR18</i><br><i>MUP1</i><br><i>TRA1</i><br><i>CIN5</i><br><i>YOR019W</i><br><i>NUM1</i><br><i>YLR352W</i><br><i>CMR3</i><br><i>YOR032W-A</i><br><i>PSA1</i><br><i>NCW2</i><br><i>YCR101C</i><br><i>ASK10</i><br><i>SCW11</i><br><i>DIA3</i><br><i>SWH1</i><br><i>OPT1</i><br><i>FRK1</i><br><i>APC2</i><br><i>YNR064C</i><br><i>YOR248W</i><br><i>SPO20</i><br><i>YMR122W-A</i><br><i>ECM18</i><br><i>ACE2</i><br><i>CTS1</i><br><i>HOS3</i><br><i>DSE3</i><br><i>SSD1</i> | <i>TMA108</i><br><i>HXK1</i><br><i>YOR316C-A</i><br><i>IST2</i><br><i>YCR100C</i><br><i>YNL058C</i><br><i>SPS22</i><br><i>YBR225W</i><br><i>PKH3</i><br><i>PHO89</i><br><i>ERV2</i><br><i>PAU7</i><br><i>RAS1</i><br><i>CIS3</i><br><i>MET30</i><br><i>MET1</i><br><i>BNA3</i><br><i>FLO11</i><br><i>NBL1</i><br><i>REC107</i><br><i>RGS2</i><br><i>GEM1</i><br><i>MDS3</i><br><i>USV1</i><br><i>YGR130C</i><br><i>GTT3</i><br><i>PCA1</i><br><i>SIM1</i><br><i>PIR1</i><br><i>DFG16</i> | <i>FRE4</i><br><i>AMA1</i><br><i>SIP5</i><br><i>BAG7</i><br><i>TOS1</i><br><i>PLB2</i><br><i>YMR114C</i><br><i>YGR066C</i><br><i>NGR1</i><br><i>ASF2</i><br><i>TDA1</i><br><i>PEX9</i><br><i>HHO1</i><br><i>GSY1</i><br><i>GNP1</i><br><i>ECM10</i><br><i>JLP1</i><br><i>AGP3</i><br><i>BOP2</i><br><i>ALT2</i><br><i>FMP48</i><br><i>DBP1</i><br><i>CRR1</i><br><i>RNR3</i><br><i>CWP1</i><br><i>SHC1</i><br><b><i>RCK1</i></b><br><b><i>CTR1</i></b> |

|                  |                |                |  |  |  |
|------------------|----------------|----------------|--|--|--|
| <i>SAP4</i>      | <i>RIE1</i>    | <i>RPL15A</i>  |  |  |  |
| <i>PCK1</i>      | <i>SMC3</i>    | <i>MCM16</i>   |  |  |  |
| <i>EFM6</i>      | <i>COS9</i>    | <i>ARG1</i>    |  |  |  |
| <i>HTL1</i>      | <i>HAT1</i>    | <i>HIS1</i>    |  |  |  |
| <i>NMT1</i>      | <i>YBL028C</i> | <i>DAS2</i>    |  |  |  |
| <i>PHM6</i>      | <i>APS2</i>    | <i>FCY2</i>    |  |  |  |
| <i>RDH54</i>     | <i>YRB1</i>    | <i>RK11</i>    |  |  |  |
| <i>MEP3</i>      | <i>UTP11</i>   | <i>SPH1</i>    |  |  |  |
| <i>IST3</i>      | <i>MRS3</i>    | <i>RPS26B</i>  |  |  |  |
| <i>MMT1</i>      | <i>BUD7</i>    | <i>MCD4</i>    |  |  |  |
| <i>RPC17</i>     | <i>CNM67</i>   | <i>CDC45</i>   |  |  |  |
| <i>FCF2</i>      | <i>YMR321C</i> | <i>MNN1</i>    |  |  |  |
| <i>SDO1</i>      | <i>IMP2</i>    | <i>FRS1</i>    |  |  |  |
| <i>REX4</i>      | <i>NVJ3</i>    | <i>PPT2</i>    |  |  |  |
| <i>BIT61</i>     | <i>PDR12</i>   | <i>YMC2</i>    |  |  |  |
| <i>ACH1</i>      | <i>ATP17</i>   | <i>RPS22A</i>  |  |  |  |
| <i>YHI9</i>      | <i>MIF2</i>    | <i>SEN34</i>   |  |  |  |
| <i>COS3</i>      | <i>LTP1</i>    | <i>YHM2</i>    |  |  |  |
| <i>YCL021W-A</i> | <i>DCD1</i>    | <i>PAL1</i>    |  |  |  |
| <i>GIM3</i>      | <i>YCR016W</i> | <i>RPL39</i>   |  |  |  |
| <i>YIL024C</i>   | <i>DUO1</i>    | <i>RPS29A</i>  |  |  |  |
| <i>LSM12</i>     | <i>TOH1</i>    | <i>RPL41A</i>  |  |  |  |
| <i>TYR1</i>      | <i>PFD1</i>    | <i>ECO1</i>    |  |  |  |
| <i>FLC1</i>      | <i>RAD33</i>   | <i>HAM1</i>    |  |  |  |
| <i>YML131W</i>   | <i>TRM11</i>   | <i>YLR053C</i> |  |  |  |
| <i>FTR1</i>      | <i>RPC11</i>   | <i>BSC2</i>    |  |  |  |
| <i>AGX1</i>      | <i>KTR6</i>    |                |  |  |  |
